# Supplementary material for: Real-time near-infrared spectroscopy monitoring of the paraspinal collateral network: comparison of two clinically available systems
Source: Research Square preprint supplement (doi:10.21203/rs.3.rs-1728216/v1), 2022-06-13
Supplement: Supplementary file 1 [file f7c533c4c65cebba812bad13.docx]

**Supplementary Table 3.** Absolute values of cnNIRS during the Aortic Cross-Clamp experiments.

|  |  | Mid thoracic level | | Lower thoracic level | | Upper lumbar level | | Lower lumbar level | |
| --- | --- | --- | --- | --- | --- | --- | --- | --- | --- |
|  |  | FORE-SIGHT | INVOS | FORE-SIGHT | INVOS | FORE-SIGHT | INVOS | FORE-SIGHT | INVOS |
| Baseline |  | 56.6 ± 6.0 | 50.6 ± 6.4 | 57.9 ± 5.6 | 55.8 ± 7.1 | 64.4 ± 7.9 | 60.9 ± 6.5 | 62.8 ± 10.8 | 60.9 ± 8.4 |
| **X-clamp** | **ISCHEMIA** | 53.6 ± 7.1 | 43.9 ± 10.2 | 48.8 ± 5.5 | 44.0 ± 6.8 | 53.7 ± 5.6 | 49.4 ± 4.9 | 50.0 ± 12.6 | 46.1 ± 8.3 |
| 2 min | 50.8 ± 12.1 | 41.9 ± 13.6 | 41.3 ± 4.2 | 36.7 ± 7.1 | 39.0 ± 8.1 | 37.2 ± 4.2 | 37.6 ± 9.5 | 37.6 ± 5.9 |
| 4 min | 50.6 ± 11.2 | 40.6 ± 14.7 | 40.9 ± 3.3 | 34.3 ± 7.5 | 38.6 ± 5.5 | 36.8 ± 6.1 | 37.3 ± 10.6 | 37.7 ± 4.3 |
| 6 min | 51.4 ± 11.1 | 42.3 ± 13.2 | 40.6 ± 3.9 | 33.9 ± 7.9 | 37.0 ± 7.4 | 35.9 ± 5.6 | 37.4 ± 9.4 | 37.9 ± 4.1 |
| 8 min | 50.4 ± 11.3 | 43.3 ± 12.4 | 40.2 ± 5.5 | 34.4 ± 8.6 | 36.8 ± 7.0 | 36.4 ± 8.2 | 37.3 ± 9.2 | 38.4 ± 4.2 |
| 10 min | 52.2 ± 8.7 | 41.8 ± 13.8 | 41.3 ± 2.6 | 31.8 ± 7.8 | 37.1 ± 6.5 | 34.3 ± 6.4 | 38.2 ± 10.8 | 36.9 ± 5.6 |
| **Clamp off** | **REPERFUSION** | 57.6 ± 6.3 | 48.4 ± 13.1 | 48.4 ± 11.5 | 54.0 ± 6.6 | 53.4 ± 11.4 | 54.4 ± 7.7 | 51.4 ± 9.9 | 56.1 ± 7.8 |
| 2 min | 55.2 ± 7.7 | 49.1 ± 11.7 | 51.8 ± 6.9 | 53.6 ± 8.1 | 55.1 ± 8.0 | 57.2 ± 7.8 | 52.9 ± 10.8 | 57.3 ± 7.5 |
| 4 min | 56.9 ± 8.3 | 51.2 ± 9.4 | 53.7 ± 7.3 | 52.9 ± 7.7 | 57.2 ± 5.8 | 58.8 ± 5.4 | 55.0 ± 8.9 | 58.6 ± 6.9 |
| 6 min | 57.6 ± 7.2 | 51.0 ± 10.4 | 54.1 ± 7.5 | 51.1 ± 7.5 | 56.0 ± 5.0 | 56.8 ± 5.2 | 53.3 ± 10.3 | 56.2 ± 8.8 |
| 8 min | 57.8 ± 7.4 | 50.4 ± 10.6 | 54.0 ± 7.8 | 51.7 ± 8.8 | 56.2 ± 4.4 | 56.2 ± 5.4 | 53.4 ± 11.0 | 56.4 ± 8.9 |
| 10 min | 58.0 ± 6.6 | 50.2 ± 10.4 | 56.0 ± 9.4 | 53.0 ± 8.3 | 58.6 ± 7.2 | 57.4 ± 6.6 | 54.8 ± 12.4 | 58.0 ± 8.3 |

Values are expressed as mean ± standard deviation. Baseline – values after surgical incisions but before aortic cross-clamping. 2 min, 4 min, 6 min, 8 min, 10 min – minutes of ischemia (after aortic cross-clamping) or reperfusion (after clamp off).
